# Supplementary material for: Plasma miR-9-3p and miR-136-3p as Potential Novel Diagnostic Biomarkers for Experimental and Human Mild Traumatic Brain Injury
Source: Int J Mol Sci. 2021 Feb 4;22(4):1563. doi: 10.3390/ijms22041563 (PMC7913923; doi:10.3390/ijms22041563)
Supplement: Supplementary file 1 [file ijms-22-01563-s001.pdf]

## Supplementary Data

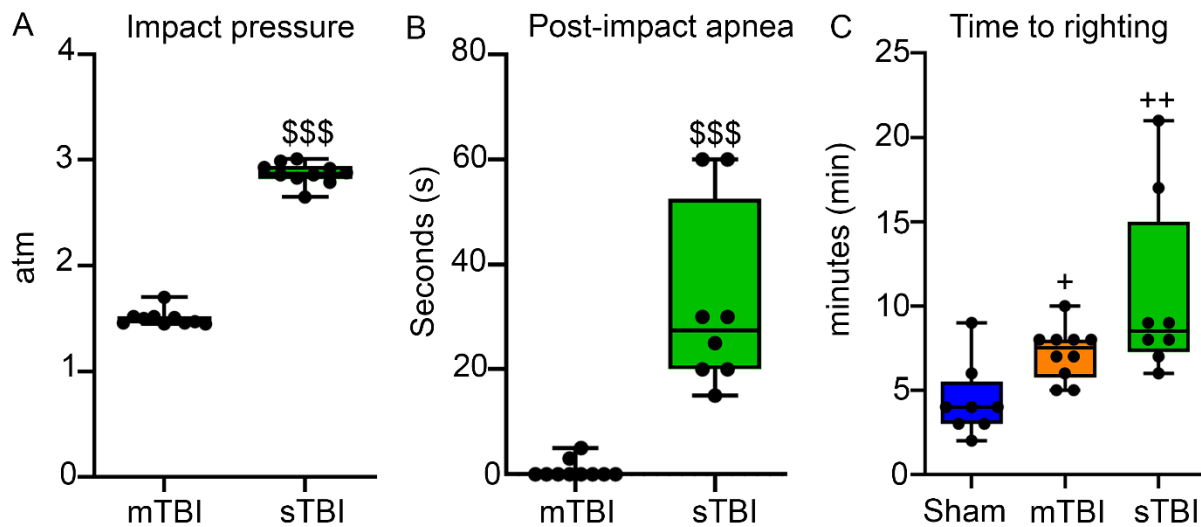

**Supplementary Figure S1. Whisker boxplots showing impact pressure, duration of post-impact apnea, and time to righting. (A)** Impact pressure was 1.9-fold higher in the sTBI group compared to mTBI ( $p<0.001$ ). **(B)** The duration of post-impact apnea was also higher in the sTBI group compared to mTBI ( $p<0.001$ ). **(C)** Righting reflex was suppressed in both mTBI ( $p<0.05$ ) and sTBI groups ( $p<0.01$ ) compared with the sham-operated controls. Statistical significance: + $p<0.05$ ; ++ $p<0.01$  (compared with sham-operated controls); \$\$\$ $p<0.001$  (compared with mTBI) (Mann-Whitney's  $U$  test). Abbreviations: atm, standard atmosphere; mTBI, mild traumatic brain injury; sham, sham-operated experimental controls; sTBI, severe traumatic brain injury (Mann-Whitney's  $U$  test).

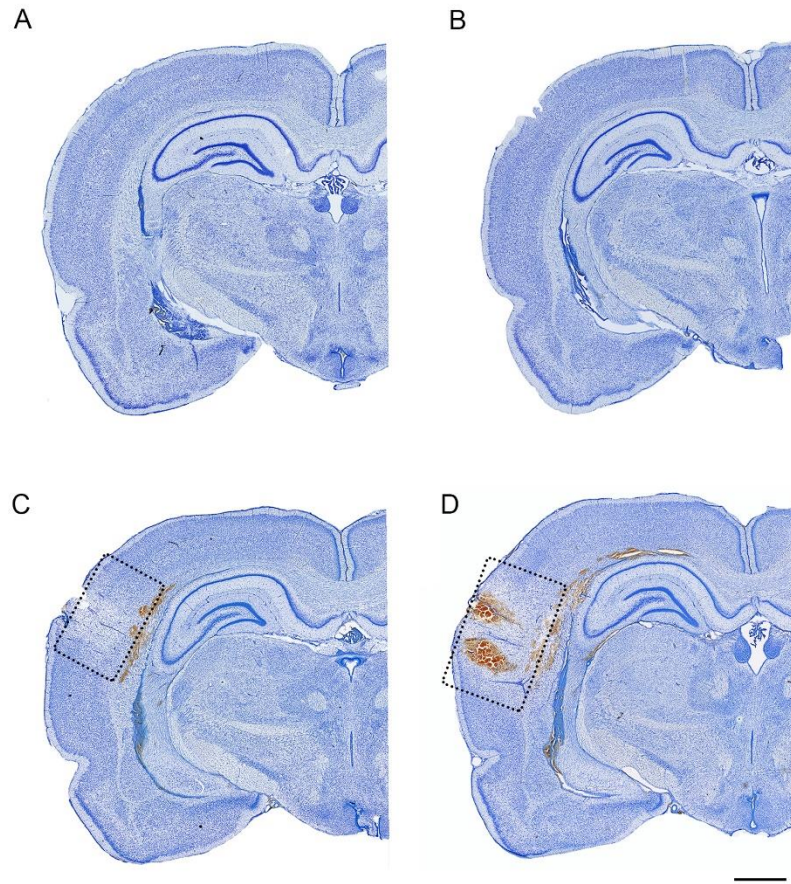

**Supplementary Figure S2. Brightfield photomicrographs of representative Nissl-stained coronal brain sections from the rostro-caudal level corresponding to the lesion epicenter of rats killed at 2 d after operation. (A)** A naïve rat. **(B)** Sham-operated experimental control with craniectomy. **(C)** A rat with a mild traumatic brain injury (mTBI). Note neuronal cell loss at the cortical lesion core (marked with a dashed box) and hemorrhage in the deep layers of the cortex and external capsule at 2 d post-TBI. **(D)** A rat with severe TBI (sTBI). Note that cortical neuronal loss and hemorrhage in the external capsule were more prominent than that after mTBI (panel C). Scale bar =1 mm

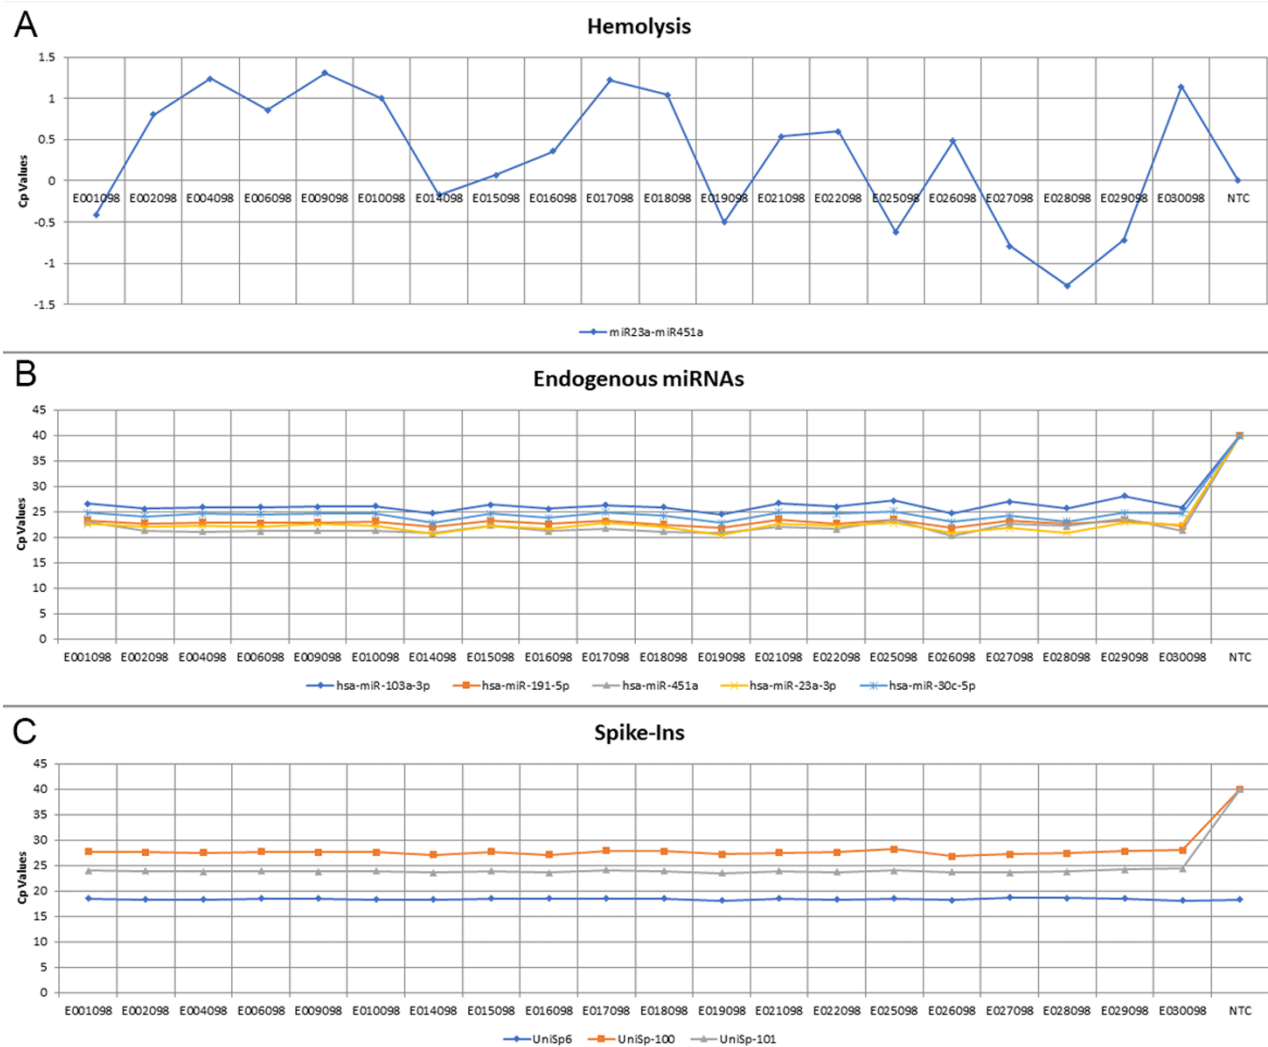

**Supplementary Figure S3. Quality control of plasma samples and extracted RNA prior to library preparation and sequencing by Qiagen. (A)** Presence of hemolysis in 20 plasma samples (E codes) and 1 negative control (NTC) used for RNA extraction was measured with the  $\Delta Cq$  (miR-23a - miR-451) method.  $\Delta Cq > 5$  was considered abnormal. **(B)** To confirm the success of RNA extraction, levels of 5 abundantly expressed endogenous plasma miRNAs were quantified: hsa-miR-103a-3p, hsa-miR-191-5p, hsa-miR-451a, hsa-miR-23a-3p, and hsa-miR-30c-5p. **(C)** Quality of inhibition of enzymatic reactions during RNA extraction was measured by analyzing the expression of synthetic spike-in controls. Abbreviations: Cp, crossing point.

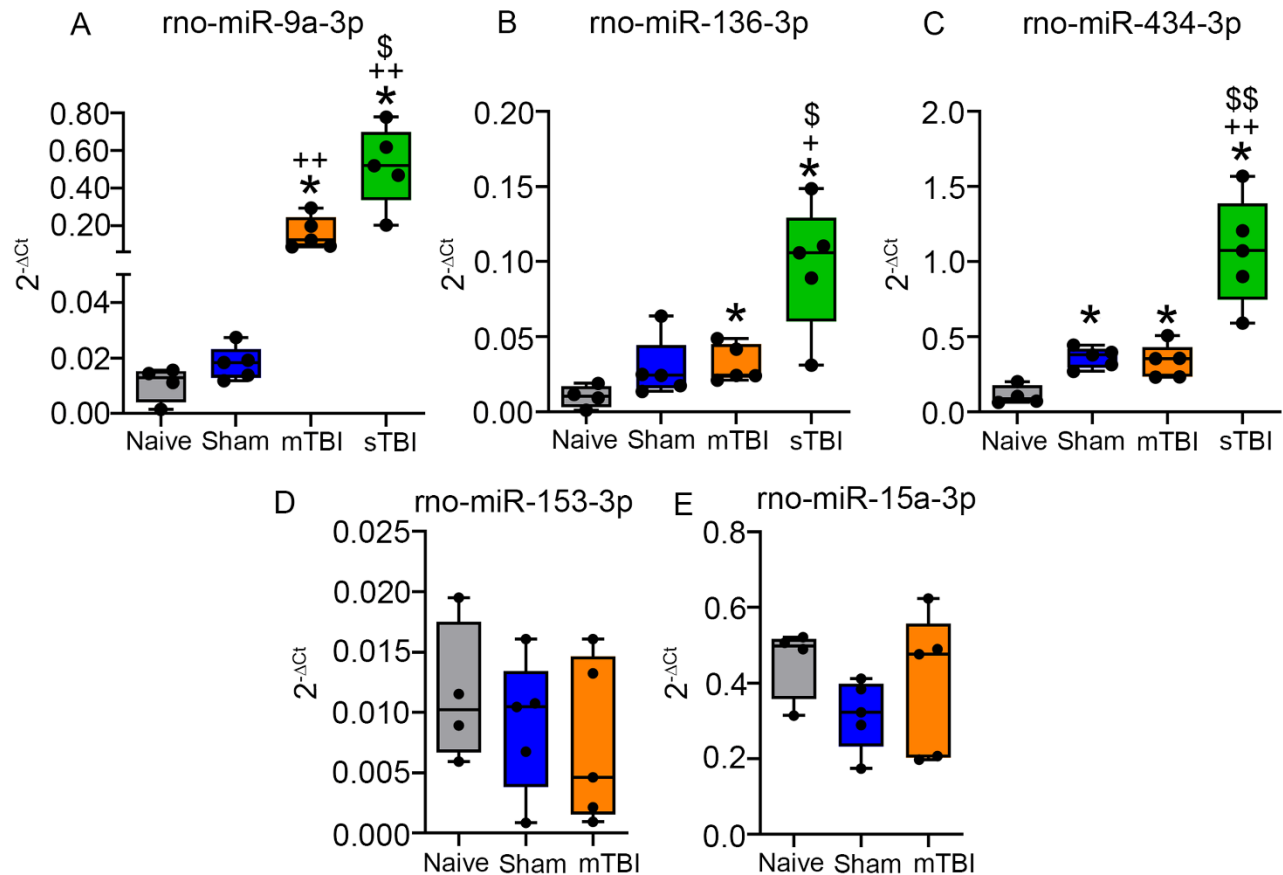

**Supplementary Figure S4. RT-qPCR based technical validation of miR-seq data.** (A) The naïve and sham-operated controls revealed similar miR-9a-3p levels. The mTBI group had higher miR-9a-3p levels than both naïve rats ( $p < 0.05$ ) and sham-operated controls ( $p < 0.01$ ). The sTBI group had higher miR-9a-3p levels than the naïve group ( $p < 0.05$ ), sham-operated controls ( $p < 0.01$ ), and the mTBI group ( $p < 0.05$ ). (B) The naïve and sham-operated controls had similar miR-136-3p levels. The mTBI group had higher miR-136-3p levels than naïve rats ( $p < 0.05$ ), but comparable to those in sham-operated controls ( $p > 0.05$ ). The sTBI group had elevated miR-136-3p levels compared with the naïve ( $p < 0.05$ ), sham-operated controls ( $p < 0.05$ ), and mTBI groups ( $p < 0.05$ ). (C) Sham-operated controls had higher miR-434-3p levels than the naïve animal ( $p < 0.05$ ). Similarly, the mTBI group had higher miR-434-3p levels compared with naïve rats ( $p < 0.05$ ), but similar levels in comparison to the sham-operated experimental controls. The sTBI group had higher miR-434-3p levels compared with the naïve rats ( $p < 0.05$ ), sham-operated controls ( $p < 0.01$ ), and mTBI groups ( $p < 0.01$ ). (D-E) No differences in miR-153-3p and miR-15a-3p levels were observed between the naïve, sham, and mTBI groups. Abbreviations: Ct, cycle threshold; mTBI, mild traumatic brain injury; sham, sham-operated controls; sTBI, severe traumatic brain injury. Statistical significance: \* $p < 0.05$  compared to naïve, + $p < 0.05$  and ++ $p < 0.01$  compared to sham-operated controls, \$ $p < 0.05$  and \$\$ $p < 0.01$  compared to mTBI (Mann-Whitney's  $U$  test).

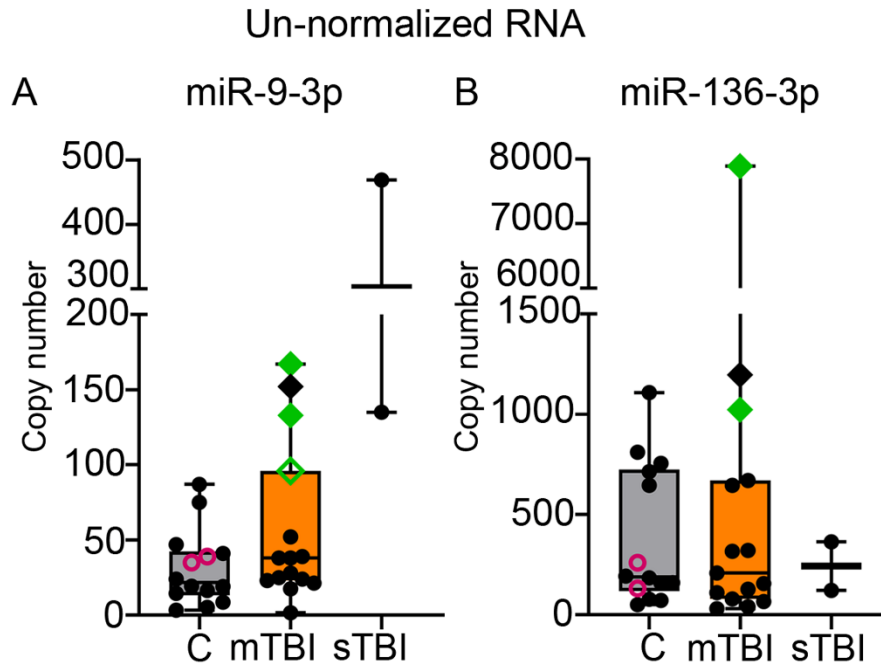

**Supplementary Figure S5. A subpopulation of human mTBI patients had plasma miR-9-3p and miR-136-3p levels higher than 1 SD above the mean of that in controls as well as elevated plasma S100B levels.** Whisker box-plots (box extends from the 25<sup>th</sup> -75<sup>th</sup> percentiles) show that **(A)** mean miR-9-3p copy numbers (per 20  $\mu$ l of PCR reaction volume, measured from un-normalized RNA, y-axis) were similar between the mTBI and the controls ( $p>0.05$ ). Interestingly, 4 of 15 mTBI patients (diamonds) had miR-9-3p number higher than mean+1SD of control mean (>56 copies). miR-9-3p levels in the sTBI patients was 9.7-fold than that of controls and 5.3-fold than that of the mTBI group. **(B)** Mean miR-136-3p copy numbers did not differ between the mTBI patients and controls ( $p>0.05$ ). In 3 of 15 mTBI patients (diamonds), the miR-136-3p copy number was higher than the mean+1SD of the control mean (>729 copies). Unlike miR-9-3p, data from the sTBI patients did not suggest any injury-dose effect. Two mTBI patients had both miR-9-3p and miR-136-3p levels higher than mean+1SD of that in controls, as well as plasma S100B levels higher than the reference of 0.1  $\mu$ g/l (solid green diamonds). Statistical test: (Mann-Whitney's *U* test). Abbreviations: C, age-matched controls; mTBI, mild traumatic brain injury; PCR, polymerase chain reaction; sTBI, severe traumatic brain injury. Symbol key: Open pink circles indicate the controls age-matched with the 2 sTBI patients; black solid diamond indicates the mTBI patient with plasma S100B level <0.1  $\mu$ g/l, but plasma miR-9-3p and miR-136-3p levels > mean+1SD of the controls; green solid diamonds indicate the mTBI patients with plasma S100B level >0.1  $\mu$ g/l as well as miR-9-3p and miR-136-3p levels > mean+1SD of the controls; open green diamond indicates the mTBI patient with plasma S100B level >0.1  $\mu$ g/l, but only miR-9-3p level > mean+1SD of the controls.

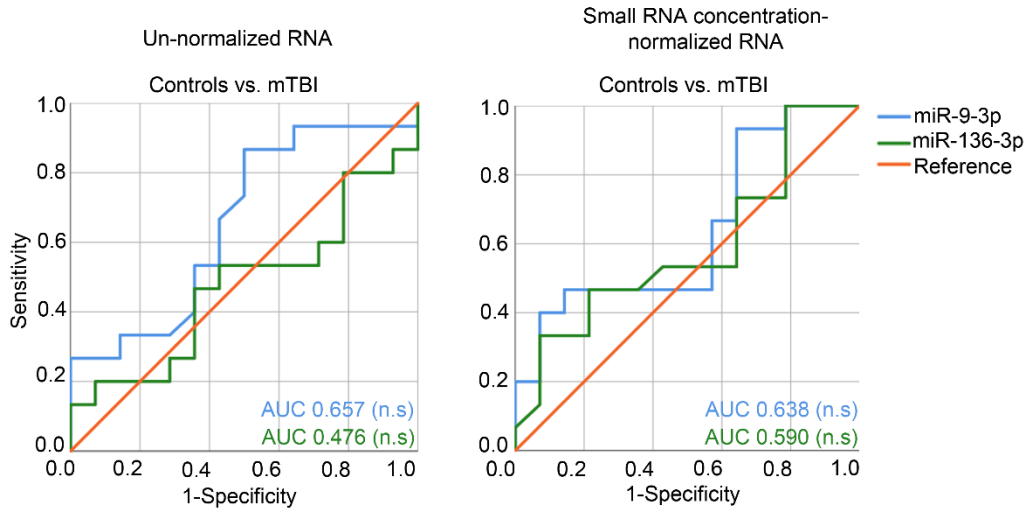

**Supplementary Figure S6. Receiver operating characteristic (ROC) analysis indicated that plasma miR-9-3p and miR-136-3p levels did not distinguish patients with mTBI from controls. (A)** Absolute copy numbers measured with ddPCR from un-normalized RNA indicated an area under the curve (AUC) of 0.657 ( $p>0.05$ ) for miR-9-3p and 0.476 ( $p>0.05$ ) for miR-136-3p. **(B)** When ddPCR was performed from the small RNA concentration-normalized RNA, miR-9-3p had an AUC of 0.638 ( $p>0.05$ ) and miR-136 had an AUC of 0.590 ( $p>0.05$ ). The combination of miR-9-3p and miR-136-3p slightly improved the AUC, but the increase was not significant. Abbreviations: AUC, area under the curve; mTBI, mild traumatic brain injury; n.s., not significant.

**Supplementary Table 1.** Receiver operator characteristic (ROC) curve and cut-point analysis for plasma rno-miR-9a-3p, rno-miR-136-3p and rno-miR-434-3p copy numbers in the whole animal cohort.

| <b>rno-miR-9a-3p</b>  |                                   |                                      |                        |                        |
|-----------------------|-----------------------------------|--------------------------------------|------------------------|------------------------|
| <b>Comparisons</b>    | <b>Area under the curve (AUC)</b> | <b>Cut-point (miRNA copy number)</b> | <b>Sensitivity (%)</b> | <b>Specificity (%)</b> |
| Naïve vs. Sham        | 0.525 (n.s)                       | -                                    | -                      | -                      |
| Naïve vs. mTBI        | 1.000**                           | 7                                    | 100                    | 100                    |
| Naïve vs. sTBI        | 1.000**                           | 64                                   | 100                    | 100                    |
| Sham vs. mTBI         | 0.975**                           | 12                                   | 90                     | 100                    |
| Sham vs. sTBI         | 1.000**                           | 64                                   | 100                    | 100                    |
| mTBI vs. sTBI         | 1.000***                          | 64                                   | 100                    | 100                    |
| <b>rno-miR-136-3p</b> |                                   |                                      |                        |                        |
| <b>Comparisons</b>    | <b>Area under the curve (AUC)</b> | <b>Cut-point (miRNA copy number)</b> | <b>Sensitivity (%)</b> | <b>Specificity (%)</b> |
| Naïve vs. Sham        | 0.825 (n.s)                       | -                                    | -                      | -                      |
| Naïve vs. mTBI        | 1.000**                           | 10                                   | 100                    | 100                    |
| Naïve vs. sTBI        | 1.000**                           | 18                                   | 100                    | 100                    |
| Sham vs. mTBI         | 0.712 (n.s)                       | -                                    | -                      | -                      |
| Sham vs. sTBI         | 0.953**                           | 18                                   | 100                    | 88                     |
| mTBI vs. sTBI         | 0.913**                           | 26                                   | 75                     | 100                    |
| <b>rno-miR-434-3p</b> |                                   |                                      |                        |                        |
| <b>Comparisons</b>    | <b>Area under the curve (AUC)</b> | <b>Cut-point (miRNA copy number)</b> | <b>Sensitivity (%)</b> | <b>Specificity (%)</b> |
| Naïve vs. Sham        | 0.900*                            | 13                                   | 75                     | 100                    |
| Naïve vs. mTBI        | 1.000**                           | 12                                   | 100                    | 100                    |
| Naïve vs. sTBI        | 1.000**                           | 53                                   | 100                    | 100                    |
| Sham vs. mTBI         | 0.850*                            | 20                                   | 90                     | 75                     |
| Sham vs. sTBI         | 1.000**                           | 53                                   | 100                    | 100                    |
| mTBI vs. sTBI         | 1.000***                          | 53                                   | 100                    | 100                    |

Abbreviations: mTBI, mild traumatic brain injury; Naïve, naïve rats; n.s, not significant; Sham, sham-operated experimental controls; sTBI, severe traumatic brain injury.

Statistical significances: \*,  $p < 0.05$ ; \*\*,  $p < 0.01$ ; \*\*\*,  $p < 0.001$ .
